# Supplementary material
Source: PubMed Central journal article supplement (PMC6748720)
Supplement: djz105_supplementary_data.pdf [file djz105_supplementary_data.pdf]

## SUPPLEMENTARY MATERIALS

### Supplementary Figures

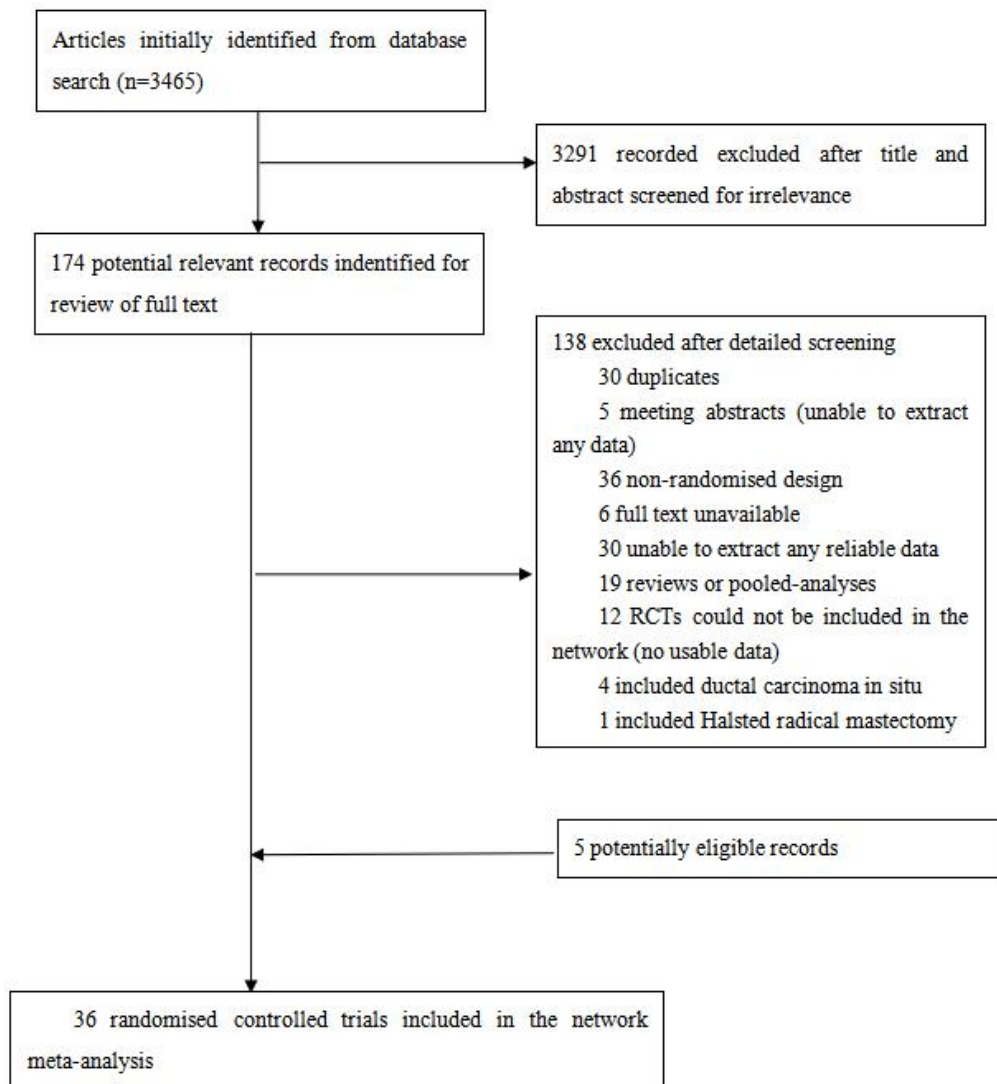

**Supplementary Figure 1.** Flow diagram depicting the literature search and criteria for selection of the included studies.

A.

|                      | Random sequence generation (selection bias) | Allocation concealment (selection bias) | Blinding of participants and personnel (performance bias) | Blinding of outcome assessment (detection bias) | Incomplete outcome data (attrition bias) | Selective reporting (reporting bias) | Other bias |
|----------------------|---------------------------------------------|-----------------------------------------|-----------------------------------------------------------|-------------------------------------------------|------------------------------------------|--------------------------------------|------------|
| Agresti 2014         | +                                           | +                                       | ?                                                         | ?                                               | +                                        | +                                    | +          |
| Arriagada 2003       | +                                           | +                                       | ?                                                         | +                                               | ?                                        | +                                    | +          |
| BLICHERT-TOFT 2008   | +                                           | +                                       | ?                                                         | +                                               | ?                                        | +                                    | +          |
| Cabanes 1992         | +                                           | ?                                       | ?                                                         | +                                               | +                                        | +                                    | ?          |
| Canavese 2016        | +                                           | +                                       | ?                                                         | +                                               | ?                                        | +                                    | +          |
| Chetty 2000          | ?                                           | ?                                       | +                                                         | +                                               | ?                                        | +                                    | +          |
| Clark 1996           | +                                           | +                                       | ?                                                         | +                                               | ?                                        | +                                    | +          |
| FISHER 1995          | +                                           | +                                       | +                                                         | +                                               | ?                                        | +                                    | +          |
| FISHER 2002          | ?                                           | ?                                       | +                                                         | +                                               | +                                        | +                                    | ?          |
| Fyles 2004           | +                                           | +                                       | +                                                         | +                                               | +                                        | +                                    | +          |
| Galimberti 2013      | +                                           | +                                       | ?                                                         | +                                               | +                                        | +                                    | +          |
| Giuliano 2011        | ?                                           | ?                                       | ?                                                         | +                                               | ?                                        | +                                    | ?          |
| Holli 2001           | +                                           | +                                       | +                                                         | +                                               | +                                        | ?                                    | ?          |
| Hughes 2013          | +                                           | +                                       | +                                                         | +                                               | ?                                        | +                                    | ?          |
| Killander 2016       | +                                           | +                                       | +                                                         | +                                               | ?                                        | +                                    | ?          |
| Kunkler 2015         | +                                           | +                                       | +                                                         | ?                                               | ?                                        | +                                    | +          |
| Litière 2012         | +                                           | +                                       | ?                                                         | +                                               | +                                        | +                                    | +          |
| Louis-Sylvestre 2003 | ?                                           | ?                                       | ?                                                         | ?                                               | ?                                        | +                                    | +          |
| Martelli 2014        | ?                                           | ?                                       | +                                                         | +                                               | ?                                        | +                                    | +          |
| Newman 1998          | ?                                           | ?                                       | ?                                                         | ?                                               | ?                                        | ?                                    | ?          |
| Poggi 2003           | ?                                           | ?                                       | +                                                         | +                                               | ?                                        | +                                    | ?          |
| Polgár 2013          | +                                           | +                                       | +                                                         | +                                               | +                                        | +                                    | +          |
| PÖTTER 2007          | ?                                           | ?                                       | +                                                         | +                                               | ?                                        | ?                                    | ?          |
| Sarrazin 1989        | +                                           | +                                       | ?                                                         | ?                                               | +                                        | +                                    | +          |
| Sato 2016            | ?                                           | ?                                       | ?                                                         | ?                                               | ?                                        | ?                                    | ?          |
| Sjostrom 2017        | +                                           | +                                       | +                                                         | +                                               | ?                                        | +                                    | +          |
| Strnad 2016          | +                                           | +                                       | ?                                                         | ?                                               | +                                        | +                                    | ?          |
| Tinterri 2013        | +                                           | +                                       | +                                                         | +                                               | ?                                        | +                                    | +          |
| van Dongen 2000      | +                                           | ?                                       | +                                                         | ?                                               | +                                        | +                                    | ?          |
| Veronesi 2001        | +                                           | ?                                       | +                                                         | +                                               | ?                                        | +                                    | +          |
| Veronesi 2003        | ?                                           | ?                                       | +                                                         | ?                                               | ?                                        | +                                    | ?          |
| Veronesi 2005        | +                                           | +                                       | ?                                                         | ?                                               | +                                        | +                                    | ?          |
| Veronesi 2013        | +                                           | +                                       | +                                                         | +                                               | +                                        | +                                    | +          |
| Voogd 1996           | ?                                           | ?                                       | +                                                         | ?                                               | +                                        | +                                    | +          |
| Wickberg 2014        | +                                           | +                                       | ?                                                         | +                                               | ?                                        | +                                    | +          |
| Winzer 2004          | +                                           | +                                       | ?                                                         | ?                                               | +                                        | +                                    | +          |

B.

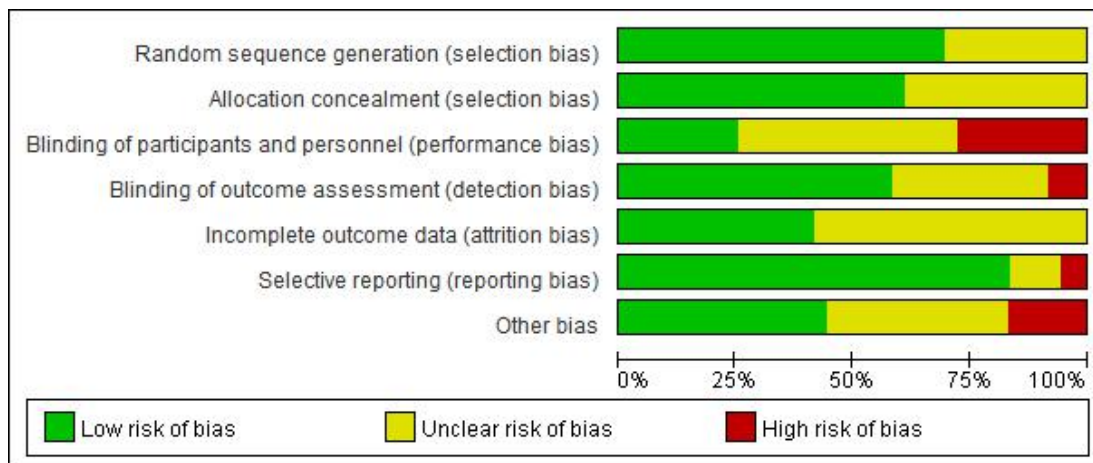

**Supplementary Figure 2. Risk of bias.** (A) For each trial. Green: low risk; yellow: moderate risk; red: high risk. (B) For the summary (based on the percentage of trials affected with each type of bias).

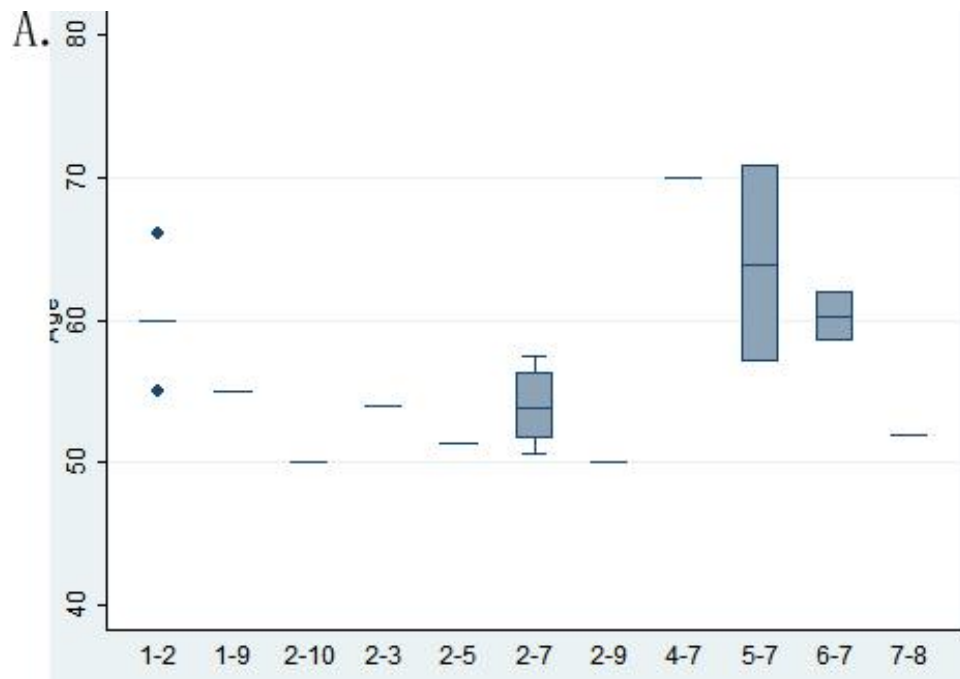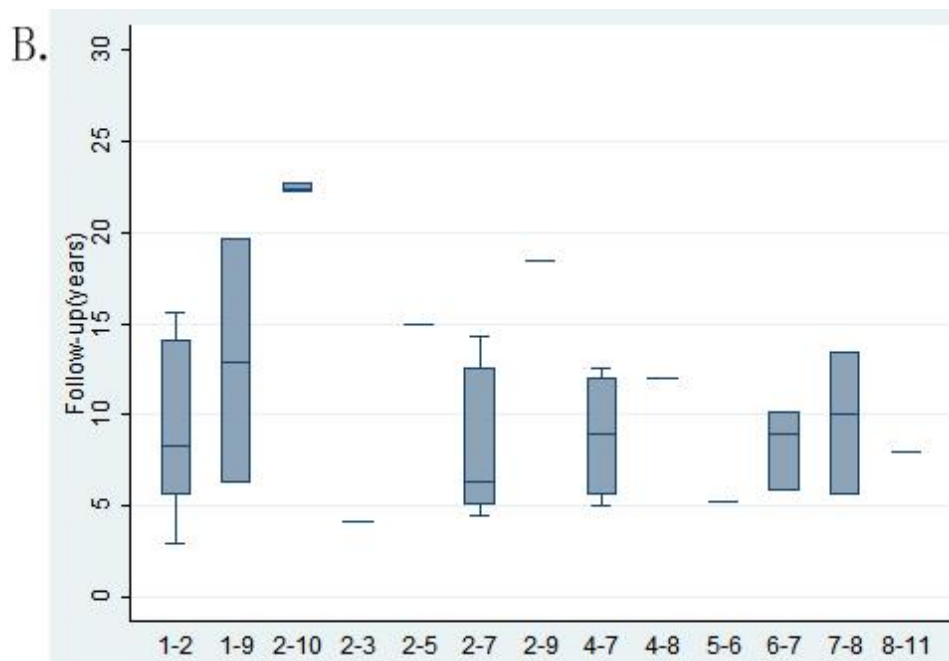

**Supplementary Figure 3. Box plots among trials included for overall survival.** A. Mean age at baseline (years); B. Mean Follow-up (years). The size of the squares is proportional to the percentage contribution of the column-defining direct comparison to the row-defining network estimate.

1=BCS+ALND, 2=BCS+ALND+RT, 3=BCS+ANS+RT, 4=BCS+SLNB,  
 5=BCS+SLNB+ART+RT, 6=BCS+SLNB+IORT, 7=BCS+SLNB+RT, 8=M, 9=M+ALND,  
 10=M+ALND+RT, 11=M+RT.

BCS+ALND=Breast-conserving surgery+Axillary lymph node dissection. BCS+ALND+RT=Breast-conserving surgery+Axillary lymph node dissection+Radiotherapy.

BCS+ANS+RT=Breast-conserving surgery+Axillary node sample+Radiotherapy.

BCS+SLNB=Breast-conserving surgery+Sentinel lymph node biopsy.

BCS+SLNB+ART+RT=Breast-conserving surgery+ Sentinel lymph node biopsy+Axillary radiotherapy +Radiotherapy. BCS+SLNB+IORT=Breast-conserving surgery+Sentinel lymph node biopsy+Intraoperative radiotherapy. BCS+SLNB+RT=Breast-conserving surgery+Sentinel lymph node biopsy+Radiotherapy. M=Mastectomy. M+ALND=Mastectomy+Axillary lymph node dissection. M+ALND+RT=Mastectomy+Axillary lymph node dissection+Radiotherapy. M+RT=Mastectomy+Radiotherapy.

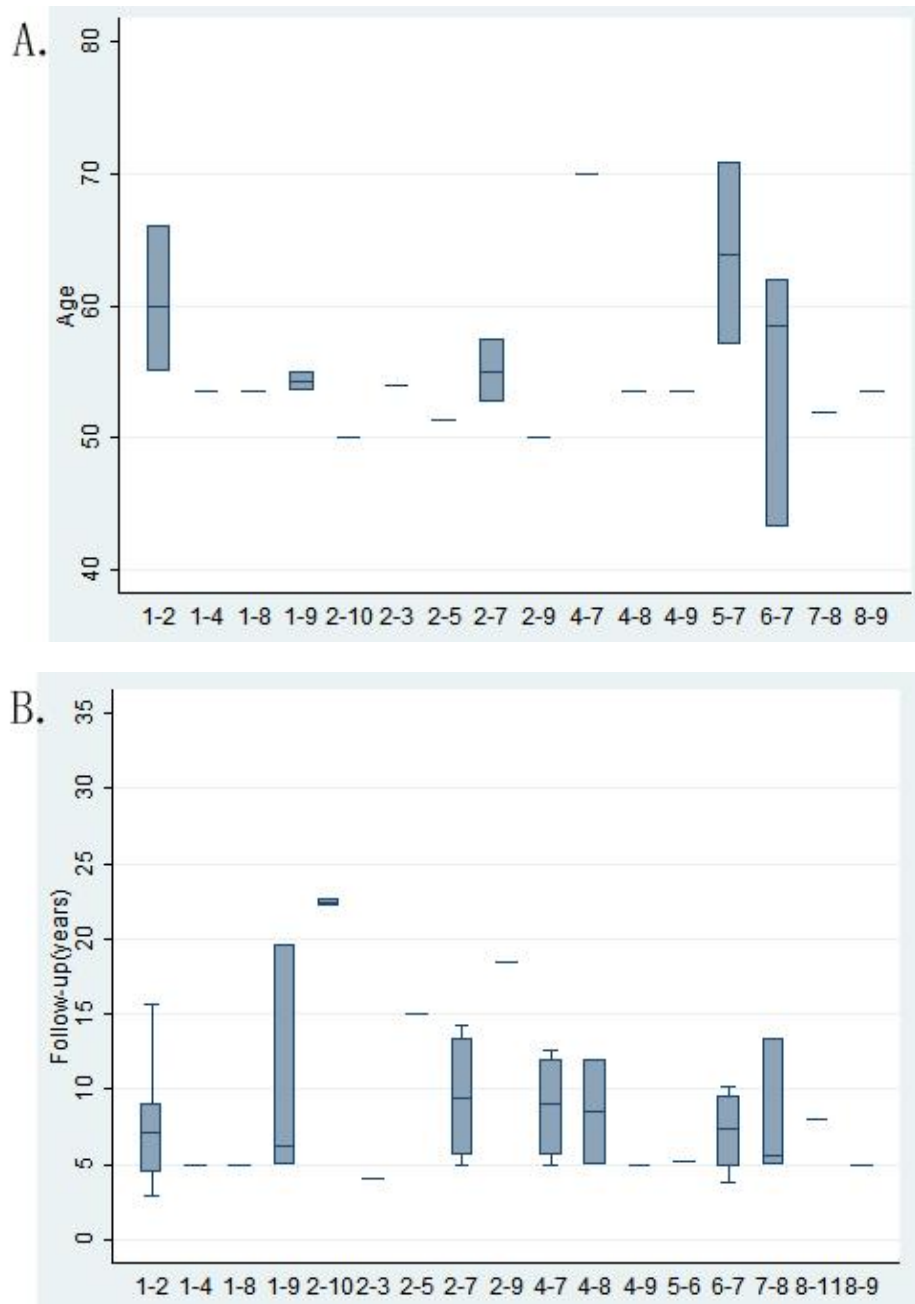

**Supplementary Figure 4.** Box plots among trials included for DFS. A. Mean age at baseline (years); B. Mean Follow-up(years) (%). The size of the squares is proportional to the percentage contribution of the column-defining direct comparison to the row-defining network estimate.

1=BCS+ALND,            2=BCS+ALND+RT,            3=BCS+ANS+RT,            4=BCS+SLNB,  
 5=BCS+SLNB+ART+RT,    6=BCS+SLNB+IORT,    7=BCS+SLNB+RT,    8=M,    9=M+ALND,  
 10=M+ALND+RT, 11=M+RT.

BCS+ALND=Breast-conserving surgery+Axillary lymph node dissection. BCS+ALND+RT=  
 Breast-conserving surgery+Axillary lymph node dissection+Radiotherapy.

BCS+ANS+RT=Breast-conserving surgery+Axillary node sample+Radiotherapy.

BCS+SLNB=Breast-conserving surgery+Sentinel lymph node biopsy.

BCS+SLNB+ART+RT=Breast-conserving surgery+ Sentinel lymph node biopsy+Axillary radiotherapy +Radiotherapy. BCS+SLNB+IORT=Breast-conserving surgery+Sentinel lymph node biopsy+Intraoperative radiotherapy. BCS+SLNB+RT=Breast-conserving surgery+Sentinel lymph node biopsy+Radiotherapy. M=Mastectomy. M+ALND=Mastectomy+Axillary lymph node dissection. M+ALND+RT=Mastectomy+Axillary lymph node dissection+Radiotherapy. M+RT=Mastectomy+Radiotherapy.

## A. OS

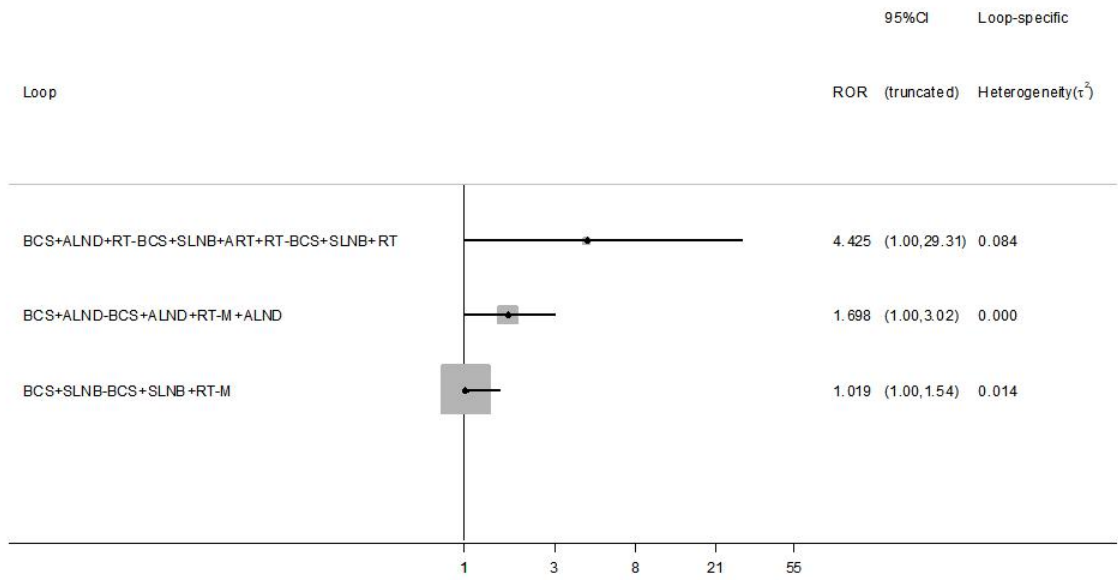

## B. DFS

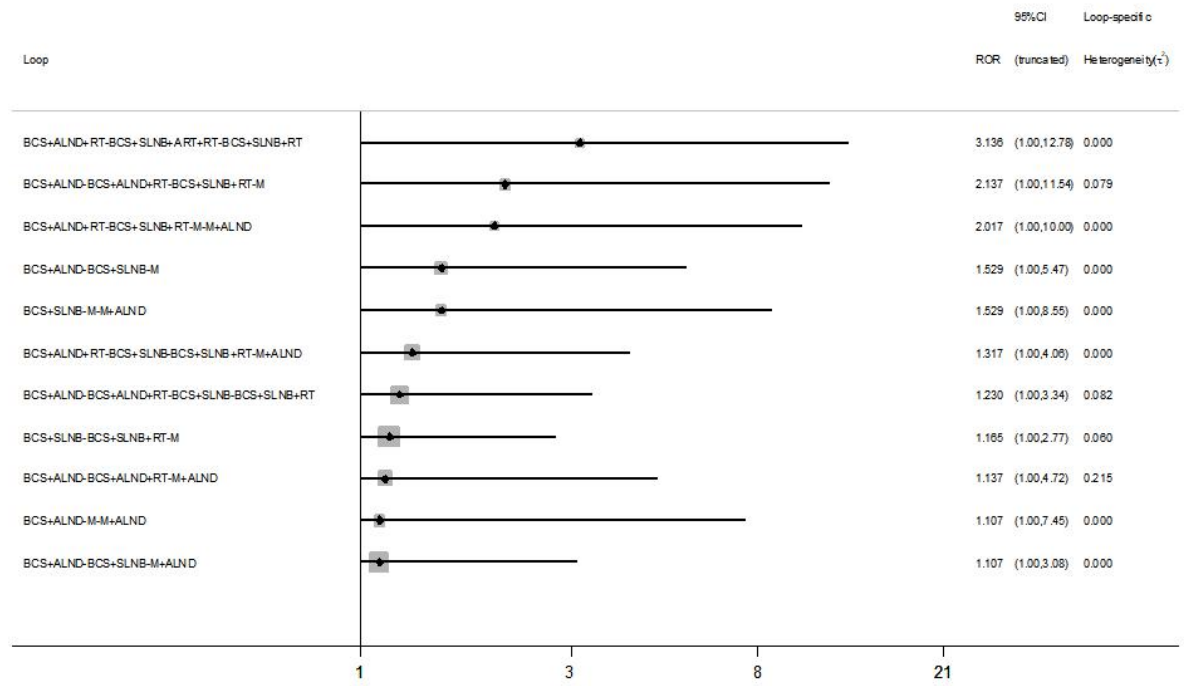



**Supplementary Figure 5.** Evaluation of the local inconsistency for (A) overall survival (OS) and (B) disease-free survival (DFS). Forest plots of inconsistency check for all closed loops in network.

BCS+ALND=Breast-conserving surgery+Axillary lymph node dissection. BCS+ALND+RT=Breast-conserving surgery+Axillary lymph node dissection+Radiotherapy.

BCS+SLNB=Breast-conserving surgery+Sentinel lymph node biopsy.

BCS+SLNB+ART+RT=Breast-conserving surgery+ Sentinel lymph node biopsy+Axillary radiotherapy +Radiotherapy. BCS+SLNB+RT=Breast-conserving surgery+Sentinel lymph node biopsy+Radiotherapy. M=Mastectomy. M+ALND=Mastectomy+Axillary lymph node dissection.

### A. OS

| Treatment       | SUCRA | PrBest | MeanRank |
|-----------------|-------|--------|----------|
| BCS+ALND        | 51.8  | 0.8    | 5.8      |
| BCS+ALND+RT     | 34.7  | 0.0    | 7.5      |
| BCS+ANS+RT      | 4.2   | 0.3    | 10.6     |
| BCS+SLNB        | 77.4  | 17.9   | 3.3      |
| BCS+SLNB+ART+RT | 34.4  | 3.6    | 7.6      |
| BCS+SLNB+IORT   | 46.7  | 7.2    | 6.3      |
| BCS+SLNB+RT     | 56.5  | 0.7    | 5.4      |
| M               | 56.7  | 2.3    | 5.3      |
| M+ALND          | 80.9  | 42.6   | 2.9      |
| M+ALND+RT       | 31.7  | 2.6    | 7.8      |
| M+RT            | 75.0  | 22.0   | 3.5      |

### B. DFS

| Treatment       | SUCRA | PrBest | MeanRank |
|-----------------|-------|--------|----------|
| BCS+ALND        | 72.6  | 10.3   | 3.7      |
| BCS+ALND+RT     | 56.7  | 1.0    | 5.3      |
| BCS+ANS+RT      | 39.0  | 8.5    | 7.1      |
| BCS+SLNB        | 59.3  | 4.6    | 5.1      |
| BCS+SLNB+ART+RT | 29.6  | 2.8    | 8.0      |
| BCS+SLNB+IORT   | 12.5  | 0.3    | 9.8      |
| BCS+SLNB+RT     | 33.5  | 0.1    | 7.7      |
| M               | 47.2  | 1.3    | 6.3      |
| M+ALND          | 63.6  | 11.0   | 4.6      |
| M+ALND+RT       | 58.6  | 13.7   | 5.1      |
| M+RT            | 77.5  | 46.5   | 3.3      |

**Supplementary Figure 6.** Values of SUCRA in terms of (A) overall survival (OS) and (B) disease-free survival (DFS). Rankograms display the cumulative probabilities of ranking first to eleventh based on the findings of the network meta-analysis; these are utilized to calculate the so-called SUCRA values.

BCS+ALND=Breast-conserving surgery+Axillary lymph node dissection. BCS+ALND+RT=Breast-conserving surgery+Axillary lymph node dissection+Radiotherapy.

BCS+ANS+RT=Breast-conserving surgery+Axillary node sample+Radiotherapy.

BCS+SLNB=Breast-conserving surgery+Sentinel lymph node biopsy.

BCS+SLNB+ART+RT=Breast-conserving surgery+ Sentinel lymph node biopsy+Axillary radiotherapy +Radiotherapy. BCS+SLNB+IORT=Breast-conserving surgery+Sentinel lymph

node biopsy+Intraoperative radiotherapy. BCS+SLNB+RT=Breast-conserving surgery+Sentinel

lymph node biopsy+Radiotherapy. M=Mastectomy. M+ALND=Mastectomy+Axillary lymph node dissection. M+ALND+RT=Mastectomy+Axillary lymph node dissection+Radiotherapy.

M+RT=Mastectomy+Radiotherapy.
